# Supplementary material for: Theoretical and Experimental Investigation of the Antioxidation Mechanism of Loureirin C by Radical Scavenging for Treatment of Stroke
Source: MDPI journal article supplement (doi:10.3390/molecules28010380), 2023-01-02

## Supporting Materials

### Theoretical and Experimental Investigation of the Antioxidation Mechanism of Loureirin C by Radical Scavenging for Treatment of Stroke

Ye-Shu Liu<sup>1,2</sup>, Guo-Ying Zhang<sup>3,\*</sup> and Yue Hou<sup>1,2,\*</sup>

<sup>1</sup>College of Life and Health Sciences, National Frontiers Science Center for Industrial Intelligence and Systems Optimization, Northeastern University, Shenyang, 110819 China

<sup>2</sup>Key Laboratory of Data Analytics and Optimization for Smart Industry, Northeastern University, Ministry of Education, Shenyang, 110819 China

<sup>3</sup>College of Physics Science and Technology, Shenyang Normal University, Shenyang, 110034 China.

\*Correspondence: gyzhang1965@sina.com or zhanggy@syu.edu.cn (G.-Y.Z.); houyue@mail.neu.edu.cn (Y.H.)

**Figure S1.** Optimized structures of LC+OH<sup>\*</sup> Pradical in water; (a) near to the OH of A ring (left) of LC; (b) near to the OH of B ring(light) of LC; (c) near to H21; (d) near to H23 and H24; (e) near to H28 and H30; (f) near to H29 and H31 and (g) near to H25 and H27. The energy difference between the LC+OH<sup>\*</sup> complex and two reactants and the distances (Å) between the oxygen atom of OH<sup>\*</sup> and the hydrogen atom of LC, between the hydrogen atom of LC and its neighbor, C, and between the two atoms of OH<sup>\*</sup> radical are shown. The Hirshfeld charges of O and H atoms of OH<sup>\*</sup> were showed at the top of Fig. S1 (d), (e), (f), (g).

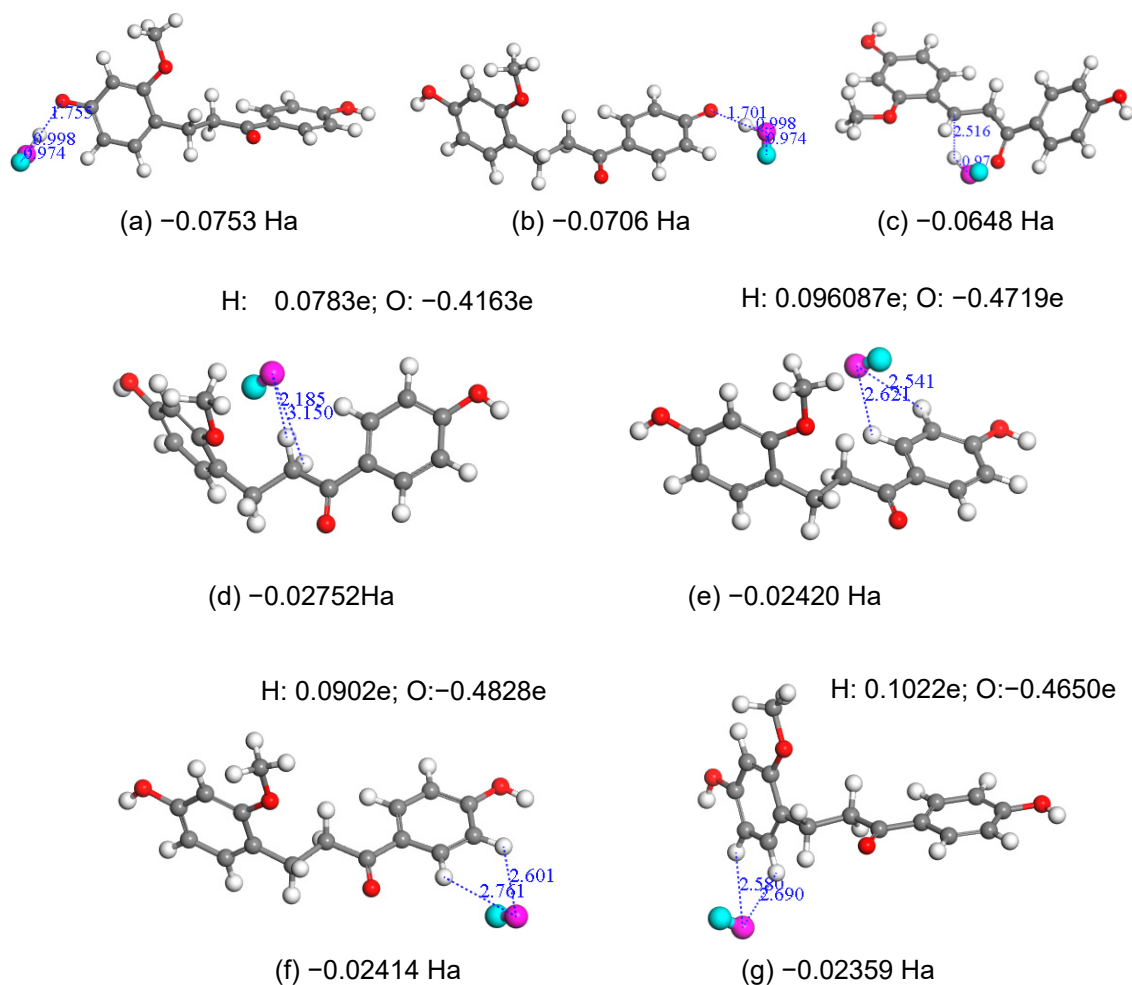

**Figure S2:** Optimized structures of LC+OH<sup>•</sup> in water. OH<sup>•</sup> was added on C14(a), C7(b), C13(c) sites of LC (A ring, left); on the site of C8 of the C=O double bond (d), on the C16(e), C15(f), C19 (g), C18(h) sites of LC (B ring, right). The energy difference between the LC+OH<sup>•</sup> adduct and two reactants and the distances (Å) between the oxygen atom of OH<sup>•</sup> and the C atom of LC are shown.

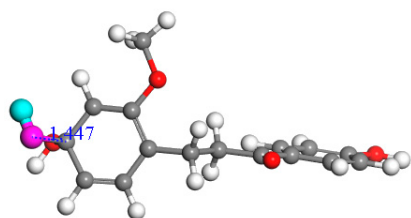

(a) C14+OH<sup>•</sup>(-0.0397 Ha)

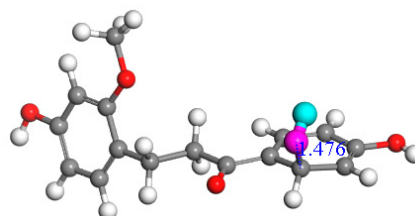

(b) C16+OH<sup>•</sup>(-0.0406 Ha)

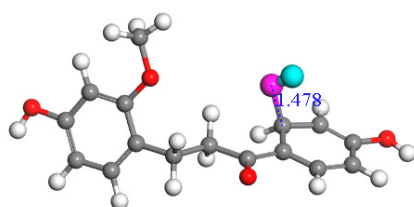

(c) C15+OH<sup>•</sup>(-0.0399 Ha)

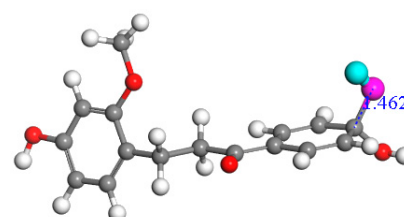

(d) C19+OH<sup>•</sup>(-0.03999 Ha)

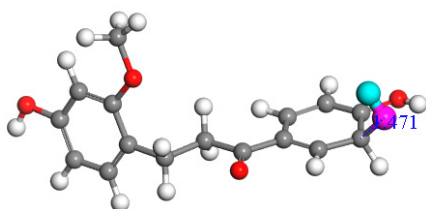

(e) C18+OH<sup>•</sup>(-0.03886 Ha)

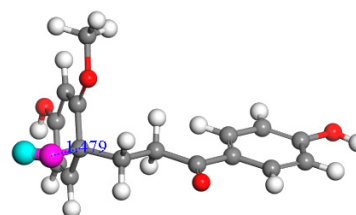

(f) C7+OH<sup>•</sup>(-0.04576 Ha)

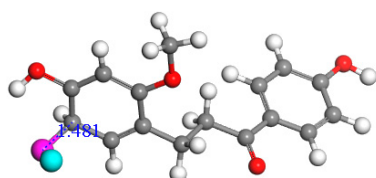

(g) C13+OH<sup>•</sup>(-0.04370 Ha)

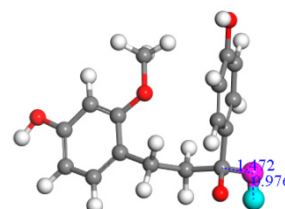

(h) C8+OH<sup>•</sup>(-0.04145 Ha)

**Figure S3:** IC<sub>50</sub> of LC

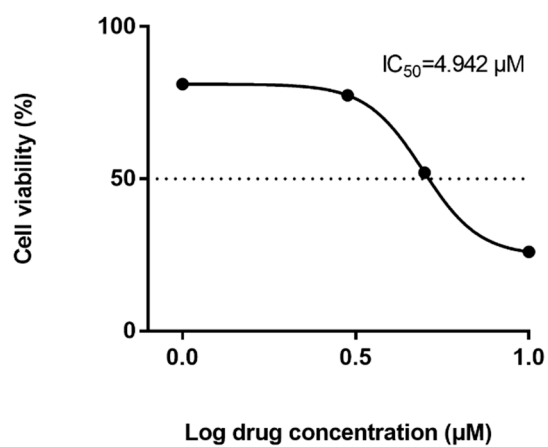

**Figure S4:** Chromatogram of LC

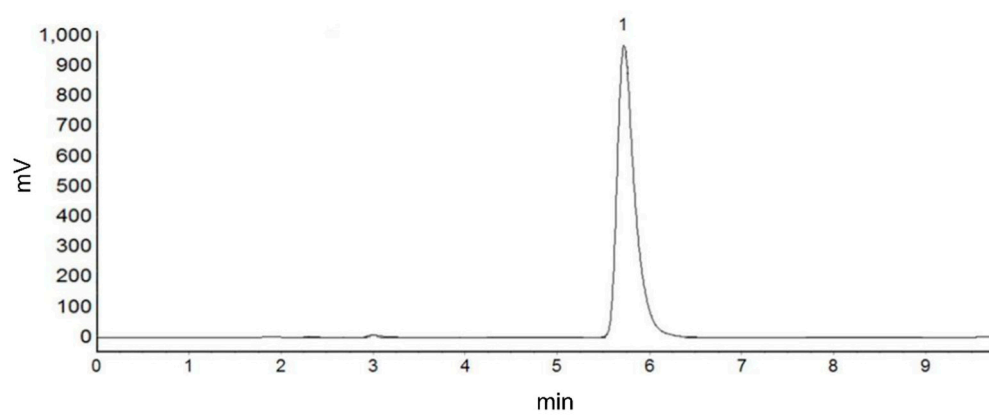

Supplement: s1 [file s1]
